# Requirement for Zebrafish Ataxin-7 in Differentiation of Photoreceptors and Cerebellar Neurons

Constantin Yanicostas<sup>1,2</sup>, Elisa Barbieri<sup>1,2,3,4,5</sup>, Masahiko Hibi<sup>6,7</sup>, Alexis Brice<sup>3,4,5</sup>, Giovanni Stevanin<sup>3,4,5,8</sup>, Nadia Soussi-Yanicostas<sup>1,2\*</sup>

**1** INSERM, U676, Hôpital Robert Debré, Paris, France, **2** Université Paris Diderot, Sorbonne Paris Cité, Paris, France, **3** INSERM, U975, Paris, France, **4** Université Pierre et Marie Curie-Paris 6, Centre de Recherche de l'Institut du Cerveau et de la Moelle épinière, UMR\_S975, GHU Pitié-Salpêtrière, Paris, France, **5** CNRS, UMR7225, Paris, France, **6** Laboratory for Vertebrate Axis Formation, RIKEN Center for Developmental Biology, Kobe, Hyogo, Japan, **7** Bioscience and Biotechnology Center, Nagoya University, Nagoya, Japan, **8** Ecole Pratique des Hautes Etudes, Paris, France

## Abstract

The expansion of a polyglutamine (polyQ) tract in the N-terminal region of ataxin-7 (*atxn7*) is the causative event in spinocerebellar ataxia type 7 (SCA7), an autosomal dominant neurodegenerative disorder mainly characterized by progressive, selective loss of rod-cone photoreceptors and cerebellar Purkinje and granule cells. The molecular and cellular processes underlying this restricted neuronal vulnerability, which contrasts with the broad expression pattern of *atxn7*, remains one of the most enigmatic features of SCA7, and more generally of all polyQ disorders. To gain insight into this specific neuronal vulnerability and achieve a better understanding of *atxn7* function, we carried out a functional analysis of this protein in the teleost fish *Danio rerio*. We characterized the zebrafish *atxn7* gene and its transcription pattern, and by making use of morpholino-oligonucleotide-mediated gene inactivation, we analysed the phenotypes induced following mild or severe zebrafish *atxn7* depletion. Severe or nearly complete zebrafish *atxn7* loss-of-function markedly impaired embryonic development, leading to both early embryonic lethality and severely deformed embryos. More importantly, in relation to SCA7, moderate depletion of the protein specifically, albeit partially, prevented the differentiation of both retina photoreceptors and cerebellar Purkinje and granule cells. In addition, [1–232] human *atxn7* fragment rescued these phenotypes showing strong function conservation of this protein through evolution. The specific requirement for zebrafish *atxn7* in the proper differentiation of cerebellar neurons provides, to our knowledge, the first *in vivo* evidence of a direct functional relationship between *atxn7* and the differentiation of Purkinje and granule cells, the most crucial neurons affected in SCA7 and most other polyQ-mediated SCAs. These findings further suggest that altered protein function may play a role in the pathophysiology of the disease, an important step toward the development of future therapeutic strategies.

**Citation:** Yanicostas C, Barbieri E, Hibi M, Brice A, Stevanin G, et al. (2012) Requirement for Zebrafish Ataxin-7 in Differentiation of Photoreceptors and Cerebellar Neurons. PLoS ONE 7(11): e50705. doi:10.1371/journal.pone.0050705

**Editor:** Laszlo Tora, Institute of Genetics and Molecular and Cellular Biology, France

**Received:** April 23, 2012; **Accepted:** October 24, 2012; **Published:** November 30, 2012

**Copyright:** © 2012 Yanicostas et al. This is an open-access article distributed under the terms of the Creative Commons Attribution License, which permits unrestricted use, distribution, and reproduction in any medium, provided the original author and source are credited.

**Funding:** This work was supported by the Institut National de la Santé et de la Recherche Médicale (Inserm), Avenir programs (Nos. R04190SP and R05245DS), the Association Française contre les Myopathies (AFM) and the Agence Nationale de la Recherche (ANR, Grant "SCA7"). The funders had no role in study design, data collection and analysis, decision to publish, or preparation of the manuscript.

**Competing Interests:** The authors have declared that no competing interests exist.

\* E-mail: nadia.soussi@inserm.fr

## Introduction

SCA7 is an autosomal dominant neurodegenerative disorder caused by the expansion of a translated CAG repeat in the *SCA7/ataxin-7* gene, leading to expansion of a polyQ tract located in the N-terminal region of the encoded protein, ataxin-7 (*atxn7*) [1]. SCA7 thus belongs to the family of polyQ expansion disorders, also named polyQ diseases, a group of neurodegenerative disorders comprising spinobulbar muscular atrophy (SBMA) [2], Huntington's disease (HD) [3], dentatorubral-pallidoluysian atrophy (DRPLA) [4] and spinocerebellar ataxia (SCA) 1, 2, 3, 6, 7, and 17 [1], [5–13].

All polyQ diseases are characterized by progressive, selective degeneration of distinct, albeit disease-specific, neuronal populations. Vulnerable neurons in SCA7 include Purkinje cells, a neuronal population that is affected in most polyQ-mediated SCAs, excepted SCA3 [14], and several other neuronal populations such as cerebellar granule cells, neurons of inferior olive and

cranial nerve nuclei, and also rod-cone photoreceptors, a cell population that is spared in other SCA types [15–17]. Beside this disease-specific neuronal vulnerability, all polyQ disorders share several common features: (i) progressive neuronal dysfunction and degeneration, (ii) expression of the disease phenotype when the size of the polyCAG/polyQ expansion reaches a precise threshold, which varies according to the gene, (iii) a strong negative correlation between age at onset and size of the polyQ tract, (iv) instability of the CAG repeat during transmission, with a strong tendency to expansion, resulting in an effect called anticipation (cf. [18–22]). Paradoxically, apart from their polyQ tract, the disease proteins display neither structural nor functional similarities.

*Atxn7* is a subunit of a multiprotein complex, the Spt-Ada-Gcn5-acetyltransferase (SAGA) complex, which is involved in histone acetylation and transcription regulation [23–26]. A body of work on several mouse models has demonstrated that rod-cone photoreceptor degeneration in SCA7 is at least partially a consequence of interference of polyQ-expanded *atxn7* with

CRX, a homeodomain protein that plays a key role for proper transactivation of photoreceptor genes [27–30]. By contrast, the molecular and cellular bases of the selective vulnerability of other neuronal populations, such as cerebellar Purkinje cells, remain poorly understood. In mammals, challenging the specific neuronal loss, the *atxn7* gene is, like almost all the genes underlying polyQ disorders, expressed in numerous neuronal populations, including neurons, which are spared in SCA7, but also in a large set of non-neuronal tissues, [16], [31], [32].

To further address this issue, a better understanding of the normal function of *atxn7* could provide important insights. However, though the group of Zoghbi generated an *atxn7* KO mice line [33], the phenotype of these mice has not yet been described. Here, we show that the *D. rerio atxn7* gene was broadly expressed throughout development from the one-cell stage onward, although in adults it was transcribed in several neuronal populations, including granule, but not Purkinje cells. Loss of function experiments demonstrated that severe depletion of zebrafish *atxn7* impaired early development, leading to embryonic lethality combined with highly deformed embryos. Significantly, in relation to the disease, moderate depletion of the protein specifically compromised the differentiation of photoreceptors and cerebellar Purkinje and granule cells, the main crucial neuronal populations that are affected in SCA7. These findings lead new insight into the specific vulnerability of cerebellar neurons in SCA7 and also suggest that altered ataxin-7 function may play a role in the disease process.

## Results

### Characterization of the Zebrafish *atxn7* gene

To identify the *Danio rerio atxn7* gene, we performed a blast analysis of the release Zv9 of the zebrafish genome sequence for genes showing sequence similarities with human *atxn7*. Our results identified 4 *atxn7* paralogs in zebrafish (Figure S1A), which are expressed in 24, 48 and 72 hours post-fecundation (hpf) embryos (Figure S1B and Figure 1G). However, molecular phylogeny deduced from ClustalW2 analysis showed that a single and *bona fide* ortholog of the human *atxn7* (*hatxn7*) gene is found in *D. rerio* (Figure S1A). This gene is referred to hereafter as zebrafish *atxn7* (*zatxn7*) (Ensembl ENSDARG00000074804). Sequencing of RT-PCR fragments encompassing the complete protein-coding region and part of the 5' and 3' UTRs showed that the zebrafish *atxn7* mRNA comprises 12 exons and encodes an 866 amino acid protein (Figure S1C) referred to hereafter as zebrafish *atxn7*. At the amino acid levels, the protein displayed 51.1 and 49.8% identities and 65.9 and 64.6% similarities compared with human and mouse *atxn7*, respectively. RT-PCR demonstrated that zebrafish *atxn7* transcripts were expressed at low levels in 1-, 4- to 8- and 16- to 64-cell embryos and at higher levels in embryos aged 10, 24, 48 and 72 hpf (Figure 1G). In dissected adult tissues, zebrafish *atxn7* RNAs were found in the brain, cerebellum, spinal cord, eye and non-neuronal tissues (Figure 1G). RNA *in situ* hybridization revealed a uniform accumulation of transcripts in 4-cell and 3-, 8 and 16 hpf embryos (Figure 1A–1D). High levels of zebrafish *atxn7* transcription were detected in the brain of 24 hpf embryos (Figure 1E). In the dissected brain of 120 hpf embryos, zebrafish *atxn7* mRNAs were found in various regions, including the anterior region of the telencephalon, optic tectum and cerebellum (Figure 1F). On adult brain sections, zebrafish *atxn7* mRNAs accumulated in several neuronal populations (Figure 2A) including cerebellar granule cells, but not Purkinje cells (Figure 2B).

### Zebrafish *atxn7* Plays an Essential Role for Embryo Development

To gain insight into zebrafish *atxn7* function, we made use of morpholino-oligonucleotide (MO)-mediated gene knockdown to investigate the phenotypes caused by various levels of zebrafish *atxn7* depletion in embryos. First, we microinjected wild-type zebrafish embryos of the AB strain (referred to below as morphants) with  $\text{MO}_{zatxn7}^{\text{AUG}}$ , a MO designed to inhibit translation of zebrafish *atxn7* mRNA (Figure 3A). Injection of 1 pmol  $\text{MO}_{zatxn7}^{\text{AUG}}$  induced high percentages of embryonic lethality, with 24.8% and 60% of morphants dying before 10 and 24 hpf, respectively ( $n = 165$ ) (Table S1). In addition, 78% of 1 pmol  $\text{MO}_{zatxn7}^{\text{AUG}}$  morphants that were still alive at 24 hpf ( $n = 66$ ) displayed severe developmental defects, including impaired head or tail differentiation or both (Fig. 3E). These phenotypes were not observed in either non-injected siblings or morphants that had received 1 pmol 5 mismatch-containing  $\text{MO}_{zatxn7}^{\text{AUG}}$  ( $\text{mmMO}_{zatxn7}^{\text{AUG}}$ ) (Figure 3C and 3D), suggesting an essential requirement for zebrafish *atxn7* in proper embryonic development.

To assess the specificity of the phenotypes observed in  $\text{MO}_{zatxn7}^{\text{AUG}}$  morphants and also test whether maternal transcripts underlie the requirement for zebrafish *atxn7* in early development, embryos of the wild-type AB strain were microinjected with a second MO targeting the donor splice site of zebrafish *atxn7* intron 4 ( $\text{MO}_{zatxn7}^{\text{SPL}}$ ) (Figure 3A). Following microinjection of 1 pmol  $\text{MO}_{zatxn7}^{\text{SPL}}$ , morphants displayed high levels of embryonic lethality, with 27.6% and 61% of injected embryos dying before 10 and 24 hpf, respectively ( $n = 141$ ) (Table S1). Also, 76% of 1 pmol  $\text{MO}_{zatxn7}^{\text{SPL}}$  morphants that were still alive at 24 hpf ( $n = 55$ ) showed developmental defects similar to those seen in 1 pmol  $\text{MO}_{zatxn7}^{\text{AUG}}$  morphants (Figure 3F). To further confirm the specificity of  $\text{MO}_{zatxn7}^{\text{SPL}}$  and estimate the levels of zebrafish *atxn7* depletion in the corresponding morphants, we carried out a RT-PCR analysis of zebrafish *atxn7* intron 4 splicing in 24 hpf embryos that had received 0.3, 0.6 or 1 pmol  $\text{MO}_{zatxn7}^{\text{SPL}}$ . RT-PCR experiments were performed using a pair of primers designed to amplify a cDNA fragment encompassing zebrafish *atxn7* exons 3 to 5 (Figure 3A). The splice-blocking activity of  $\text{MO}_{zatxn7}^{\text{SPL}}$  was evidenced by the dose-dependent inhibition of zebrafish *atxn7* intron 4 splicing in  $\text{MO}_{zatxn7}^{\text{SPL}}$  morphants (Figure 3B). We note that a nearly complete inhibition of intron 4 splicing was observed in 1 pmol  $\text{MO}_{zatxn7}^{\text{SPL}}$  morphants.

### Mild Zebrafish *atxn7* Depletion Compromises Photoreceptor Differentiation

While embryos that had received 0.3 pmol  $\text{MO}_{zatxn7}^{\text{AUG}}$  or 0.3 pmol  $\text{MO}_{zatxn7}^{\text{SPL}}$  did not display obvious developmental defects nor excessive lethality (Table S1), 15% ( $n = 113$ ) and 12% ( $n = 125$ ) of these embryos showed partially depigmented retina, respectively (Figure S2). To further investigate the requirement for zebrafish *atxn7* in retina differentiation, eye sections of 3 days post-fecundation (dpf) 0.3 pmol  $\text{MO}_{zatxn7}^{\text{SPL}}$  morphants were analysed by immunocytochemistry using an anti-rhodopsin antibody. In all the retinas analysed ( $n = 8$ ), whatever their pigmentation, we observed a marked disorganization of the photoreceptor layer (Figure 4C and 4D). These phenotypes were absent in both age-matched non-injected siblings ( $n = 6$ ) (Figure 4A and 4B) and 1 pmol  $\text{mmMO}_{zatxn7}^{\text{AUG}}$  morphants ( $n = 7$ ) (Figure 4E and 4F). Importantly, rhodopsin immunostaining also revealed that 0.3 pmol  $\text{MO}_{zatxn7}^{\text{SPL}}$  morphants displayed a marked reduction in the number of photoreceptors (Figure 4C and 4D),

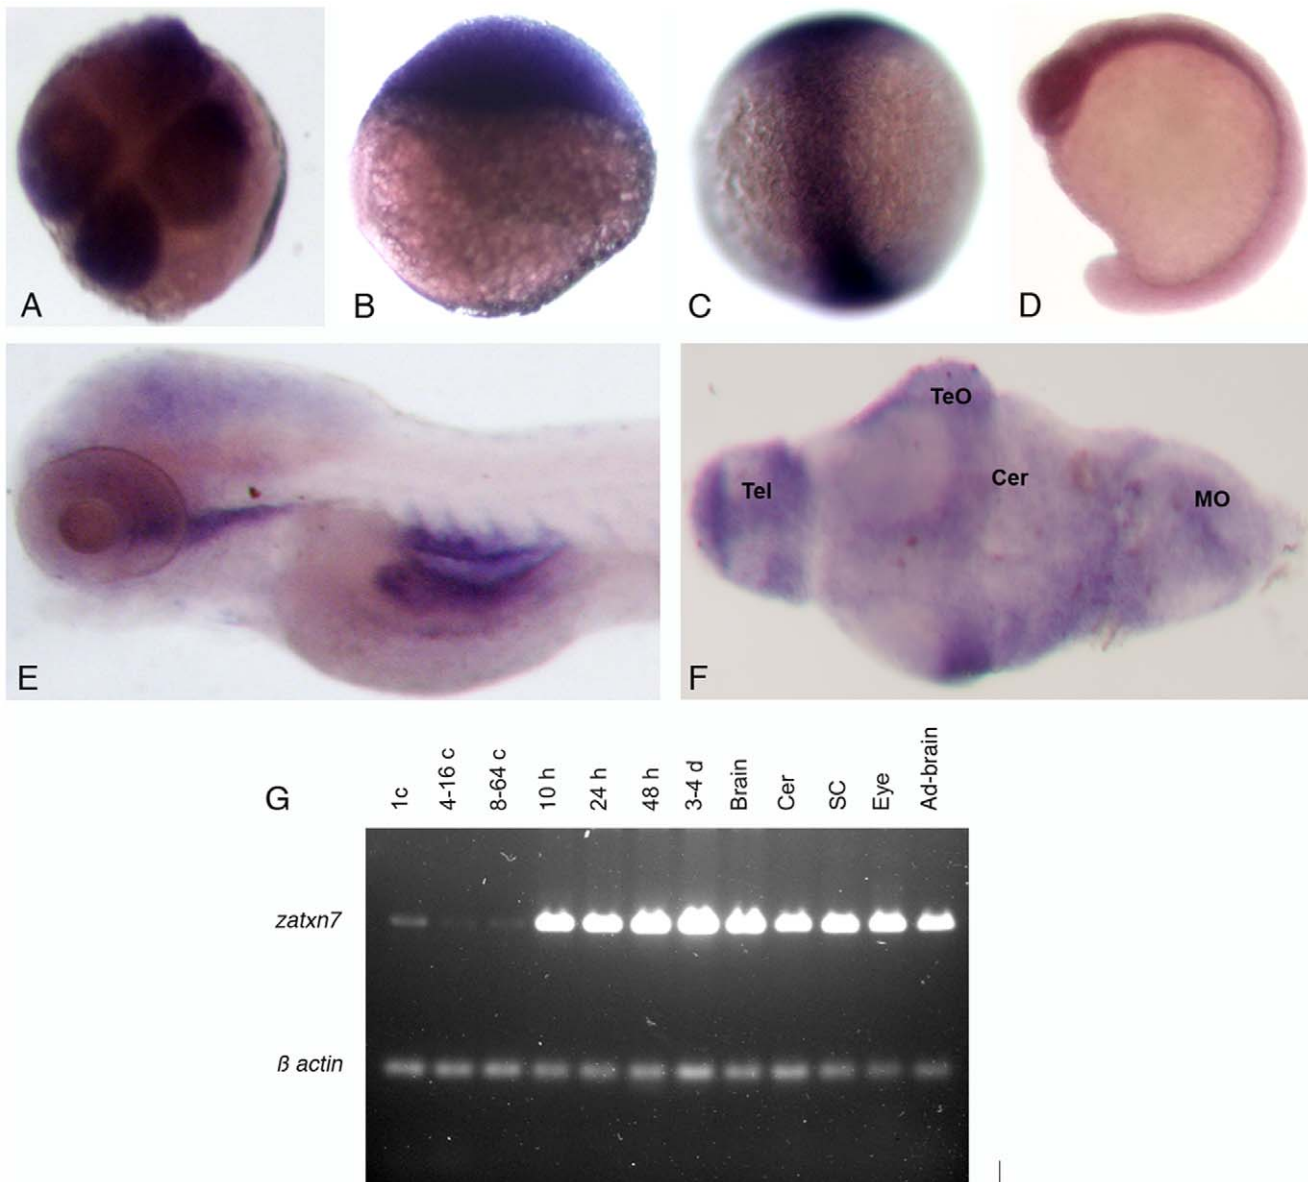

**Figure 1. Transcription of the zebrafish *atxn7* gene during development.** (A-F) *In situ* detection of zebrafish *atxn7* transcripts on either whole mount embryos at the four-cell stage (A), or 3 (B), 8 (C), 16 (D), and 48 hpf (E) or dissected brain of 120 hpf embryos (F). (G) RT-PCR analysis of zebrafish *atxn7* transcript accumulation in 1- (1 c), 4- to 16- (4-16 c), and 8- to 64-cell embryos (8-64 c), or 10 (10 h), 24 (24 h), 48 (48 h) and 72 to 96 hpf embryos (3-4 d) and dissected adult brain (Brain), cerebellum (Cer), spinal cord (SC), eye (Eye) and remaining tissues (Ad-brain). RT-PCR for  $\beta$ -actin is shown as a positive control. Abbreviations: Cer, cerebellum; MO, medulla oblongata; TeO, tectum opticum; Tel, telencephalon. doi:10.1371/journal.pone.0050705.g001

demonstrating an essential requirement for zebrafish *atxn7* in the full differentiation of retina photoreceptors.

### Moderate Zebrafish *atxn7* Depletion Specifically Impairs Purkinje and Granule Cell Differentiation

Because cerebellar neurons are particularly prone to degeneration in SCA7, we next tested whether partial depletion of zebrafish *atxn7* in 0.3 pmol  $MO_{zatxn7}^{SPL}$  morphants induced an impaired differentiation of cerebellar neurons. First, we determined the number of Purkinje cells on consecutive serial optic sections of brains dissected from 5 dpf 0.3 pmol  $MO_{zatxn7}^{SPL}$  morphants by immunocytochemistry using an anti-parvalbumin-7 (Pvalb7) antibody that specifically labels these neurons [34]. In 5 dpf embryos that had received 1 pmol  $mmMO_{zatxn7}^{AUG}$ , we

detected  $191 \pm 8$  Purkinje cells ( $n = 7$ ) (Figure 5A' and 5C). By contrast, the number of Pvalb7-expressing cells was very significantly reduced to  $79 \pm 25$  ( $n = 8$ ,  $p < 0.0001$ ) in 5 dpf embryos that had received 0.3 pmol  $MO_{zatxn7}^{SPL}$  (Figure 5B' and 5D), suggesting a requirement for zebrafish *atxn7* in Purkinje cell differentiation. To further investigate the physiology of Purkinje cells in 0.3 pmol  $MO_{zatxn7}^{SPL}$  morphants, we analysed the expression of three additional proteins that have been shown to accumulate to high levels in zebrafish Purkinje cells, namely zebrin II, carbonic anhydrase 8 (Ca8) and retinoic-related orphan receptor  $\alpha$  (ROR $\alpha$ ) [34]. In brains of 5 dpf 0.3 pmol  $MO_{zatxn7}^{SPL}$  morphants, we observed a marked decrease in the number of cells expressing ROR $\alpha$  (Fig. S3B and S3B'') compared with 5 dpf embryos that had received 1 pmol  $mmMO_{zatxn7}^{AUG}$  (Figure S3A

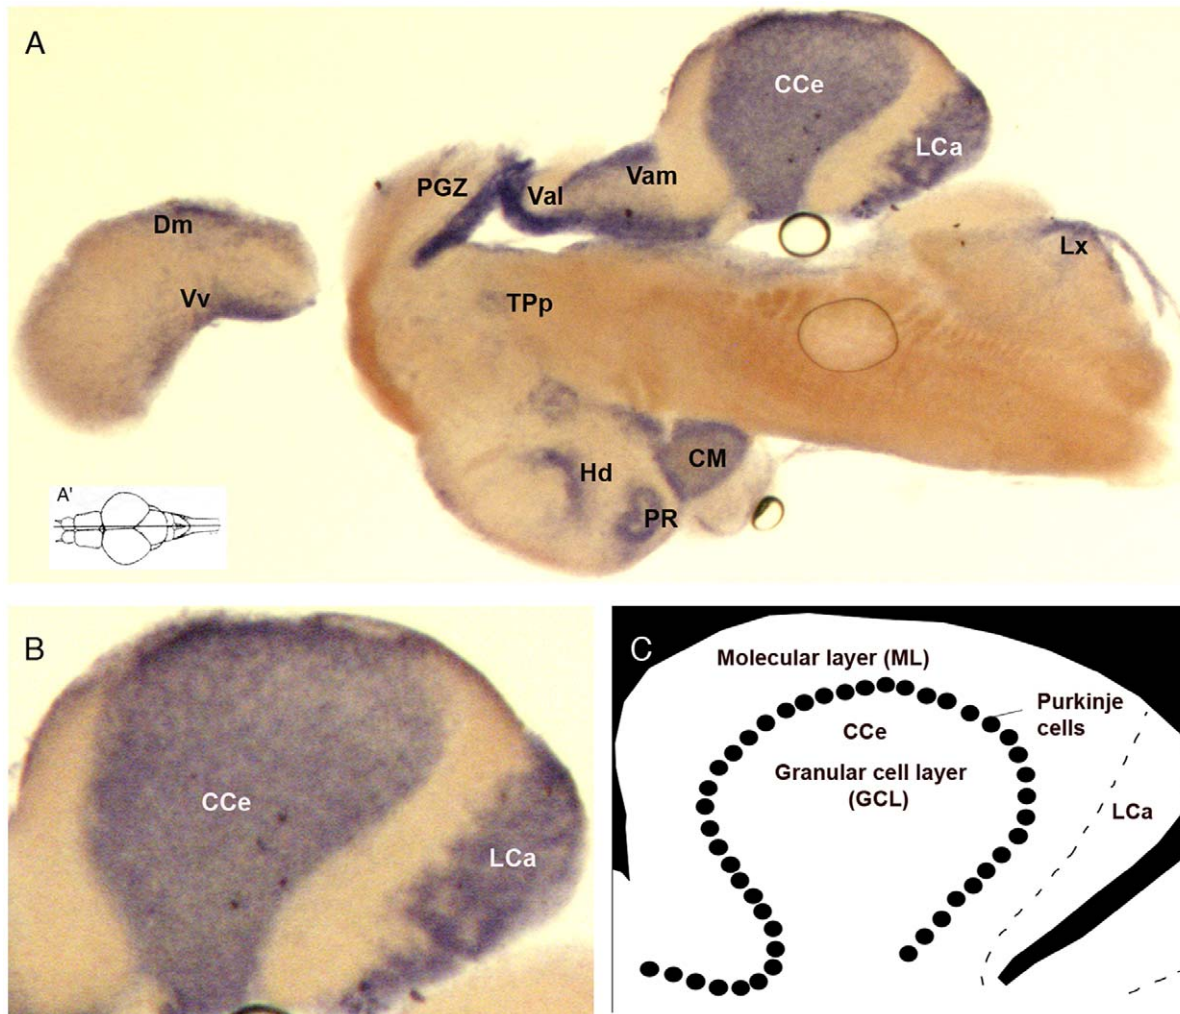

**Figure 2. Transcription of the zebrafish *atxn7* gene in adult brain sections.** *In situ* detection of zebrafish *atxn7* transcripts on midsagittal section of adult brain (A). Dorsal view of the adult zebrafish brain showing the position level of the parasagittal section shown in A (A'). A magnified view of the section showed in panel A (B). Schematic representation of zebrafish cerebellum (C). Anterior is to the left. Abbreviations: CC, crista cerebellaris; CCe, corpus cerebelli; CM, corpus mamillare; Dm, medial zone of dorsal telencephalic area; Hd, dorsal zone of the periventricular hypothalamus; LCa, lobus caudalis cerebelli; LX, lobus vagus; MON, medial octavolateralis nucleus; PGZ, periventricular grey zone; PR, posterior recess of diencephalic ventricle; TPp, periventricular nucleus of the posterior tuberculum; Val, lateral division of valvula cerebelli; Vam, medial division of valvula cerebellaris; Vv, ventral nucleus of the ventral telencephalon.  
doi:10.1371/journal.pone.0050705.g002

and S3A<sup>+</sup>). Similarly, the number of cells expressing either zebrin II (Figure 6A and 6D) or Ca8 (not shown) was markedly reduced in 0.3 pmol *MO<sub>z</sub>atxn7<sup>SPL</sup>* morphants, compared with embryos that received 1 pmol *mmMO<sub>z</sub>atxn7<sup>AUG</sup>*. These results confirm that differentiation of Purkinje cells was severely compromised following moderate depletion of zebrafish *atxn7*. In addition to photoreceptor and Purkinje cell degeneration, SCA7 patients also show progressive loss of granule cells [18], [31], a defect also observed in SCA7 mouse models [35] and *in vitro* [36]. To test whether moderate zebrafish *atxn7* depletion also affects the differentiation of granule cells, dissected brains of 0.3 pmol *MO<sub>z</sub>atxn7<sup>SPL</sup>* and 1 pmol *mmMO<sub>z</sub>atxn7<sup>AUG</sup>* morphants were analysed by immunocytochemistry using an antibody directed against Vglut1, a vesicular glutamate transporter, which is expressed at high levels in zebrafish granule cells [34]. Our results demonstrate a marked decrease in the number of cells expressing Vglut1 in 5 dpf 0.3 pmol *MO<sub>z</sub>atxn7<sup>SPL</sup>* morphants (Figure 5B<sup>+</sup> and 5D<sup>+</sup>) compared with age-matched controls that received

1 pmol *mmMO<sub>z</sub>atxn7<sup>AUG</sup>* (Figure 5A<sup>+</sup> and 5C<sup>+</sup>), showing that granule cell differentiation also was partially compromised following moderate zebrafish *atxn7* depletion.

As the reduced number of Purkinje cells observed in 5 dpf 0.3 pmol *MO<sub>z</sub>atxn7<sup>SPL</sup>* morphants might be caused by delayed differentiation of these neurons, we compared the number of zebrin II-expressing cells in dissected brains of 1 pmol *mmMO<sub>z</sub>atxn7<sup>AUG</sup>* and 0.3 pmol *MO<sub>z</sub>atxn7<sup>SPL</sup>* morphants at 5, 6 and 7 dpf. In embryos injected with 1 pmol *mmMO<sub>z</sub>atxn7<sup>AUG</sup>* and aged 5, 6, and 7 dpf, we observed 183±11 (*n* = 5), 204±7 (*n* = 6), and 244±13 (*n* = 5) zebrin II-expressing cells, respectively (Figure 6A–6C). By contrast, in 0.3 pmol *MO<sub>z</sub>atxn7<sup>SPL</sup>* morphants, we observed a highly significant decrease in the number of Purkinje cells at 5 (90±18, *n* = 5, *p* < 0.0001), 6 (104±25, *n* = 6, *p* < 0.0001), and 7 dpf (143±23, *n* = 6, *p* < 0.0001) (Figure 6D–6F), strongly suggesting that partial zebrafish *atxn7* depletion partly compromised, but did not slow down Purkinje cell differentiation.

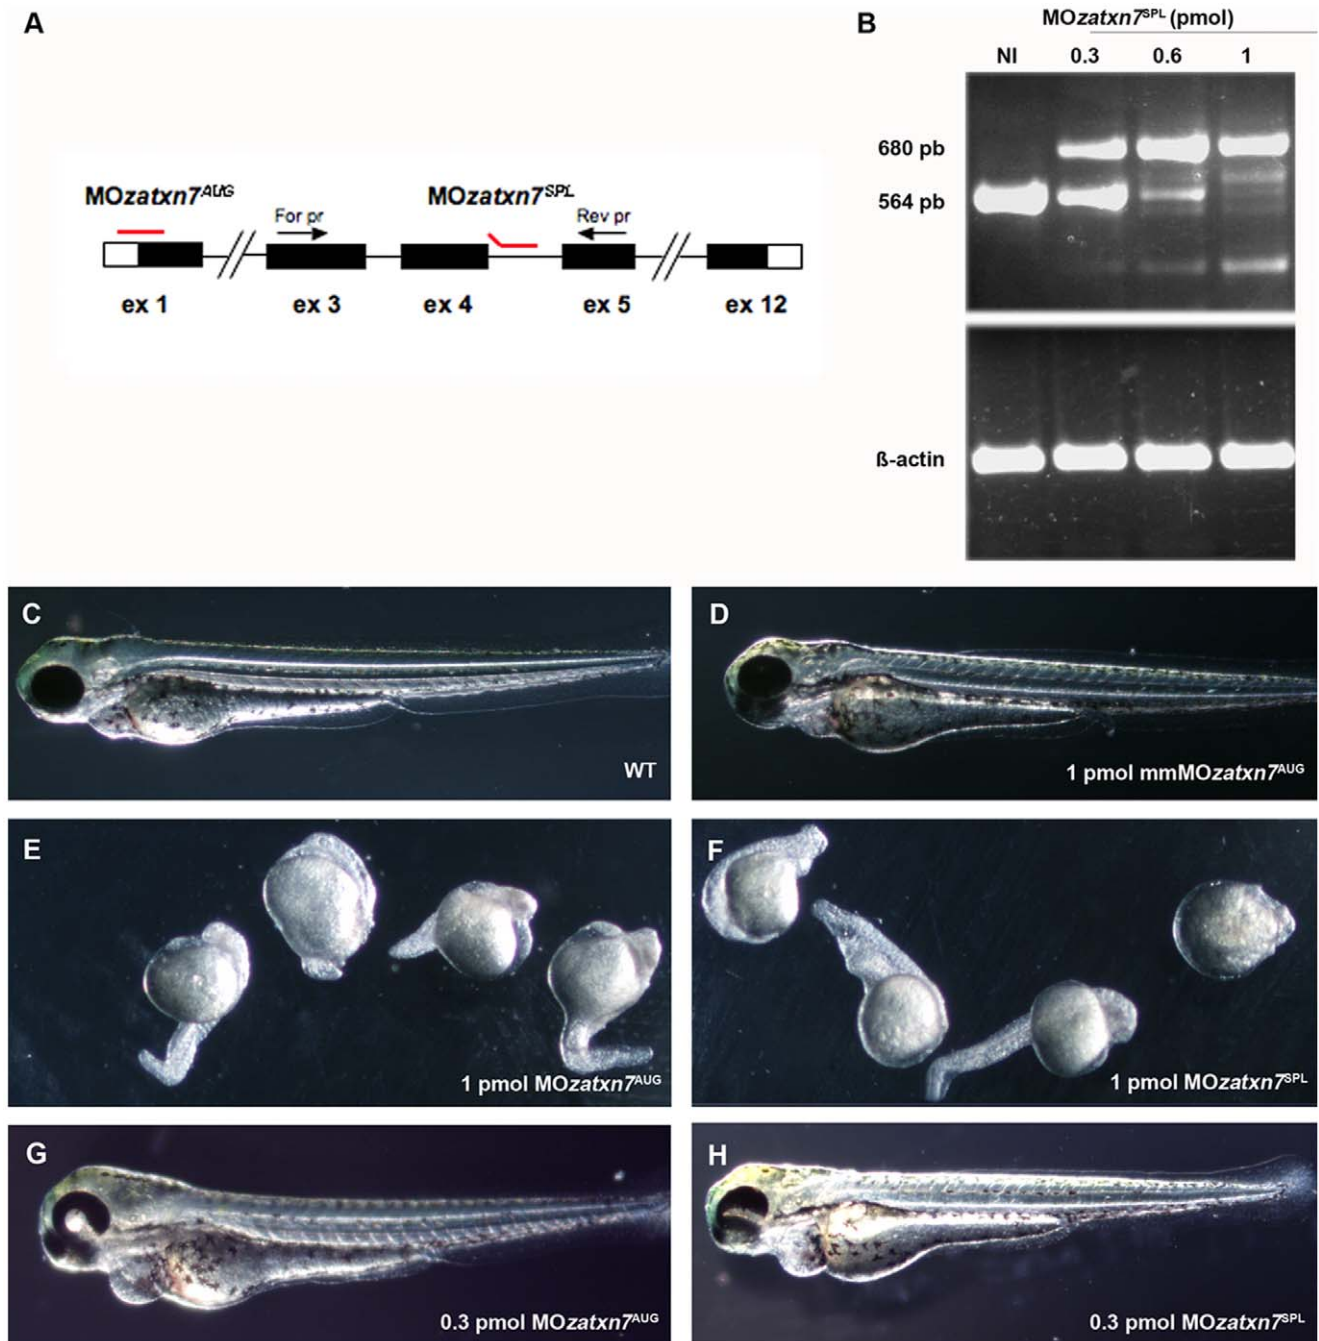

**Figure 3. Morpholino-mediated inactivation of zebrafish *atxn7* impairs embryonic development.** Schematic representation of the zebrafish *atxn7* gene showing exons 1 (ex 1), 3 to 5 (ex 3–5) and 12 (ex 12) (black boxes), location of *MOZatxn7<sup>AUG</sup>* and *MOZatxn7<sup>SPL</sup>* (red lines) and position of oligonucleotides (black arrows) used for RT-PCR analysis of *MOZatxn7<sup>SPL</sup>*-mediated inhibition of zebrafish *atxn7* intron 4 splicing (black arrows) (A). Untranslated exonic regions and intronic sequences are depicted as empty boxes and single lines, respectively. RT-PCR analysis of zebrafish *atxn7* intron 4 splicing in non-injected (NI) and morphant embryos that had received 0.3, 0.6 and 1 pmol *MOZatxn7<sup>SPL</sup>* (B). RT-PCR for  $\beta$ -actin is shown as a positive control. Phenotypes of 48 hpf wild-type embryo (C), and age-matched 1 pmol mm*MOZatxn7<sup>AUG</sup>* (D), 0.3 pmol *MOZatxn7<sup>AUG</sup>* (G) and 0.3 pmol *MOZatxn7<sup>SPL</sup>* morphants (H). Phenotypes of 24 hpf 1 pmol *MOZatxn7<sup>AUG</sup>* (E) and 1 pmol *MOZatxn7<sup>SPL</sup>* morphants (F). doi:10.1371/journal.pone.0050705.g003

We could not rule out the possibility that the reduced number of cerebellar neurons observed in 5 dpf 0.3 pmol *MOZatxn7<sup>SPL</sup>* morphants was caused by apoptosis of these cells soon after their differentiation. Accordingly, to assess whether moderate depletion of zebrafish *atxn7* induced increased levels of brain neuron apoptosis, we performed a TUNEL assay on dissected brains of

5 dpf 1 pmol mm*MOZatxn7<sup>AUG</sup>* ( $n = 7$ ) and 0.3 pmol *MOZatxn7<sup>SPL</sup>* morphants ( $n = 6$ ), and age-matched DNase-treated wild-type controls ( $n = 6$ ). While numerous labelled cells scattered throughout the brain were detected following DNase treatment (Figure S4B), a low and roughly similar number of apoptotic cells was detected in both 1 pmol mm*MOZatxn7<sup>AUG</sup>* (Figure S4D) and

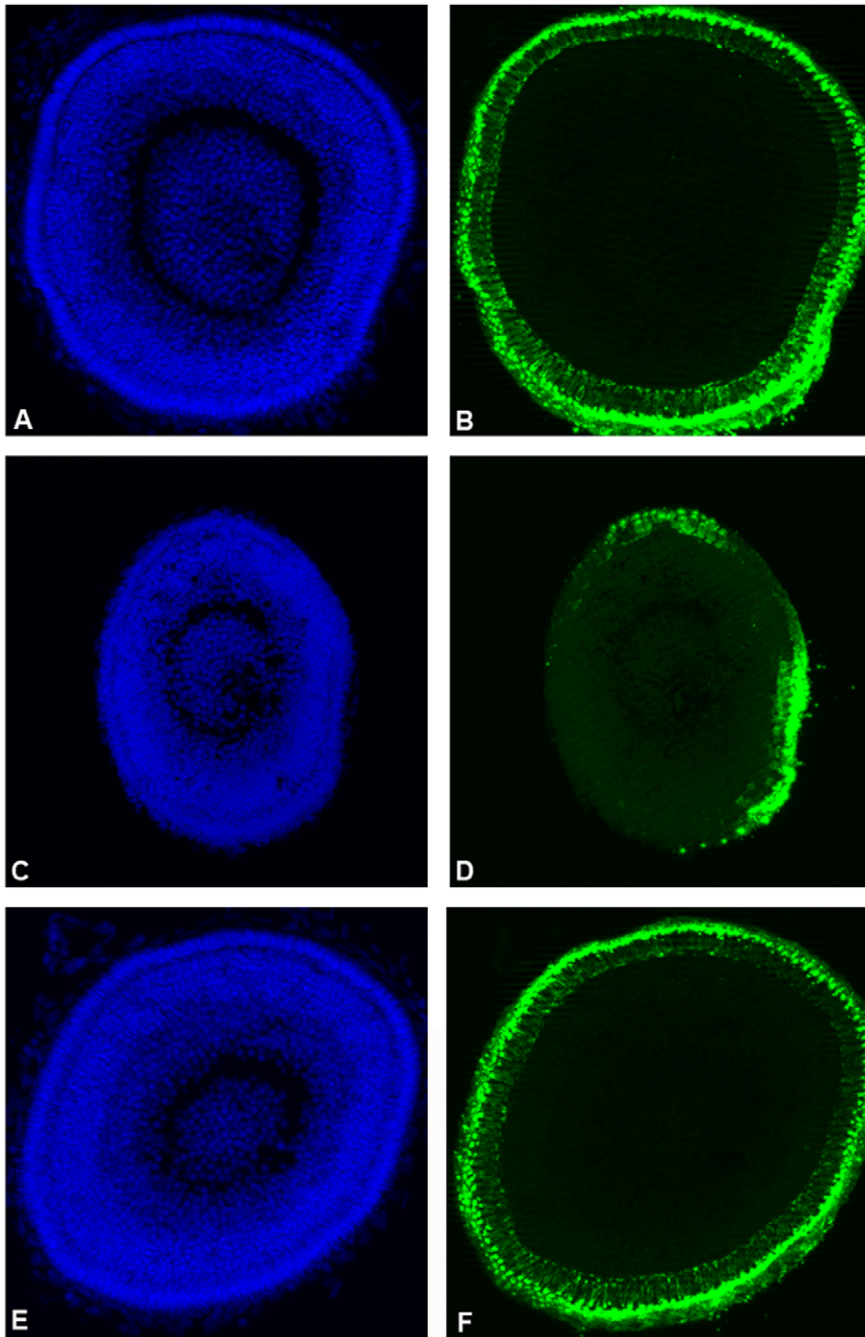

**Figure 4. Partial zebrafish *atxn7* depletion impairs photoreceptor differentiation.** DAPI staining (A, C, and E) and rhodopsin immunostaining (B, D, and F) of eye cryosections of 48 hpf wild type embryo (A and B) and age-matched 0.3 pmol MO*zatxn7*<sup>SPL</sup> (C and D) and 1 pmol mmMO*zatxn7*<sup>AUG</sup> morphant embryos (E and F). doi:10.1371/journal.pone.0050705.g004

0.3 pmol MO*zatxn7*<sup>SPL</sup> morphants (Figure S4F), demonstrating that increased levels of apoptosis was not the cause of the reduced number of cerebellar neurons observed in 0.3 pmol MO*zatxn7*<sup>SPL</sup> morphants.

#### [1–232] Fragment of Human *atxn7* can Compensate Partial Loss of Zebrafish *atxn7*

To further confirm that loss of both photoreceptors and cerebellar neurons observed in 0.3 pmol MO*zatxn7*<sup>SPL</sup> morphants (Figure 4 and Figure 5) was caused by partial depletion of zebrafish

*atxn7*, and also to test whether human *atxn7* could compensate for loss of function of the zebrafish protein, wild-type embryos were injected with a mixture comprising 0.3 pmol MO*zatxn7*<sup>SPL</sup> and 2 fmol of *in vitro* transcribed human *atxn7* mRNA encoding truncated human *atxn7* (ATXN7T: amino acids 1–232), which has successfully been used to model SCA7 *in vivo* in *Drosophila* [37] and is close to the shortest human *atxn7* fragment found in human brain or transgenic SCA7 mice [38]. In all the embryos that received 0.3 pmol MO*zatxn7*<sup>SPL</sup> and 2 fmol truncated human *atxn7* mRNA encoding [1–232] N-Terminal fragment of the

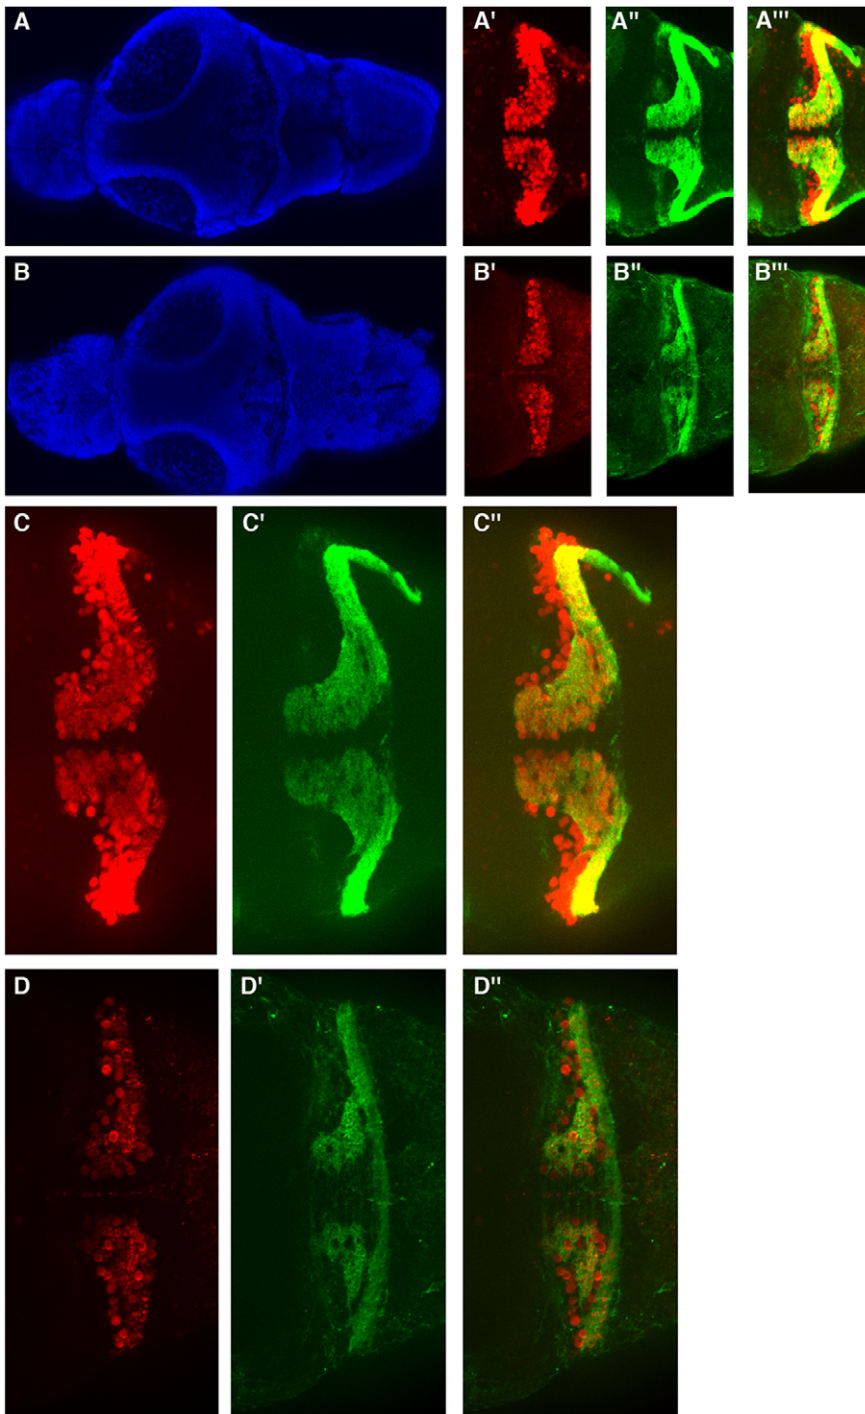

**Figure 5. Moderate zebrafish *atxn7* depletion impairs the differentiation of cerebellar neurons.** Dorsal views of dissected brains from 5 dpf 1 pmol mmMOzatxn<sup>AUG</sup> (A, A', A'', A''', C, C' and C'') and 0.3 pmol MOzatxn<sup>SPL</sup> morphants (B, B', B'', B''', D, D' and D''). DAPI staining (A and B), Pav7 immunostaining of Purkinje cells (A', B', C and D) and Vglut1 immunostaining of granule cells (A'', B'', C' and D''). Anterior is to the left. Enlarged views of the brains showed in A' (C), A'' (C'), A''' (C''), B' (D), B'' (D'), and B''' (D''). Merge images of the photographs A' and A'' (A'''), B' and B'' (B'''), C and C' (C''), and D and D' (D'').

doi:10.1371/journal.pone.0050705.g005

protein ( $n = 78$ ), retina pigmentation was similar to that observed in non-injected siblings or 1 pmol mmMOzatxn<sup>AUG</sup> morphants (not shown). Also, in all the retinas analysed ( $n = 7$ ), rhodopsin immunostaining of eye sections revealed that differentiation of photoreceptors was similar in 0.3 pmol MOzatxn<sup>SPL</sup> morphants that also received 2 fmol truncated human *atxn7* mRNA

(Figure 7C–7C''), compared with non-injected embryos (data not shown) or 1 pmol mmMOzatxn<sup>AUG</sup> morphants (Figure 7A–7A''). Next, we investigated whether [1–232] fragment of human *atxn7* was also able to rescue cerebellar neuron differentiation defects observed in 0.3 pmol MOzatxn<sup>SPL</sup> morphants (Figure 5). In the dissected brains of morphants that received 0.3 pmol MOzatxn<sup>SPL</sup>

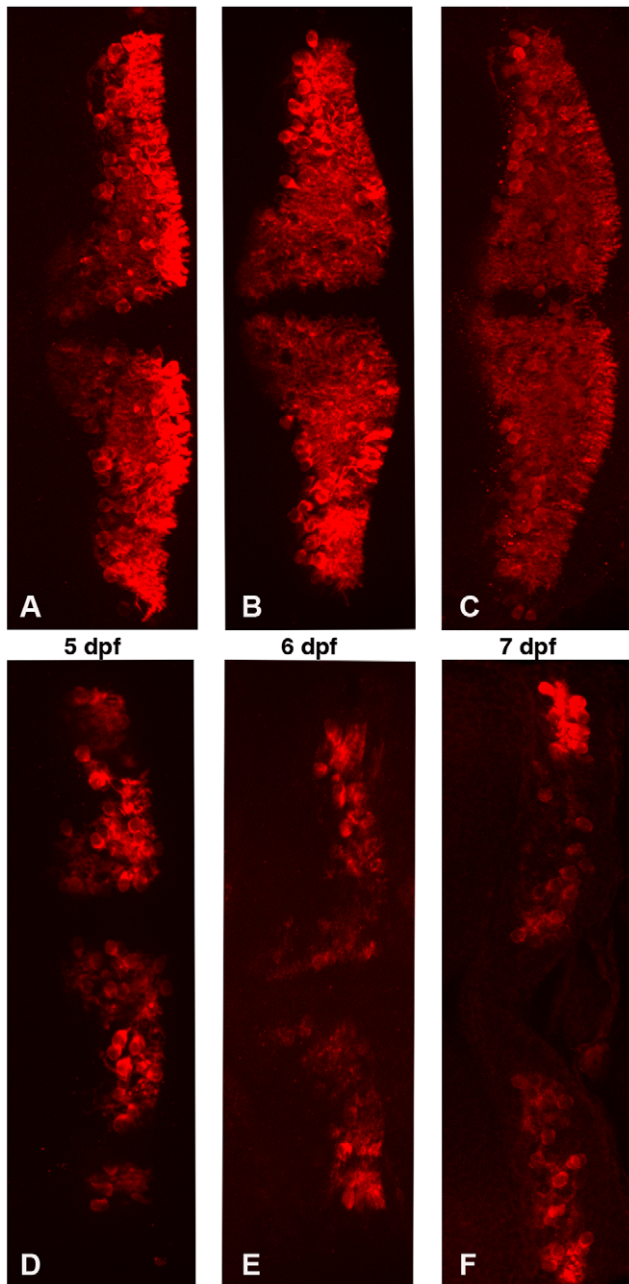

**Figure 6. Partial zebrafish atxn7 depletion impairs the differentiation of cerebellar neurons.** Dorsal views of dissected brains from 5 (A and D), 6 (B and E), and 7 dpf (C and F) 1 pmol mmMOzatxn<sup>AUG</sup> (A, B, and C) and 0.3 pmol MOzatxn<sup>SPL</sup> morphants (D, E, and F) immunostained with an anti-zebrin II antibody, which specifically labels Purkinje cells.  
doi:10.1371/journal.pone.0050705.g006

and 2 fmol truncated human *atxn7* RNA ( $n = 6$ ), we detected  $186 \pm 12$  ( $n = 6$ ) Purkinje cells as revealed by Pvalb7 immunostaining (Figure 8C and 8C''), a number similar to that observed in 1 pmol mmMOzatxn<sup>AUG</sup> morphants ( $191 \pm 8$ ,  $n = 7$ ,  $p = 0.4$ ) (Figure 8A and 8A''). Similarly, Vglut1 immunostaining demonstrated that the number of granule cells seen in dissected brains of 0.3 pmol MOzatxn<sup>SPL</sup> morphants that also received 2 fmol truncated human *atxn7* RNA (Fig. 8C' and 8C'') was similar to that observed in 1 pmol mmMOzatxn<sup>AUG</sup> morphants (Fig. 8A'

and 8A''). Taken together, these data demonstrate that [1–232] N-terminal fragment of human *atxn7* was able to fully rescue cerebellar neuron and photoreceptor differentiation defects caused by partial depletion of the zebrafish protein.

### Partial Zebrafish atxn7 Depletion does not Affect Overall Brain, Spinal Cord and Muscle Development

To determine whether the differentiation of other brain neurons and/or glial cells were also compromised following mild zebrafish *atxn7* depletion, we analysed the accumulation pattern of both the glial acidic fibrillary protein (GFAP), a protein accumulated at high levels in all glial cells [39], and HuC, a pan-neuronal protein, which is expressed in all brain neurons [40], in dissected brains of 5 dpf 0.3 pmol MOzatxn<sup>SPL</sup> morphants ( $n = 5$ ) and age-matched control embryos ( $n = 6$ ). No differences in either the size and organization of brain regions or the accumulation pattern of the two proteins could be detected between 5 dpf wild-type controls (Figure S5A-S5C) and age-matched 0.3 pmol MOzatxn<sup>SPL</sup> morphants (Figure S5D-S5F), suggesting that overall brain organization was not impaired following moderate zebrafish *atxn7* loss of function.

We also analysed whether partial depletion of zebrafish *atxn7* caused defects in spinal cord development, motor neuron differentiation or body muscle structure and/or organization. We first made use of the Tg[NBT:MAPT-GFP]zc1 transgenic line to visualize the spinal cord and motor neuron axons [41]. Following injection of 0.3 pmol MOzatxn<sup>SPL</sup> in embryos of the Tg[NBT:MAPT-GFP]zc1 line, we observed that both spinal cord anatomy and motor neuron axon arborisation were fully similar in 0.3 pmol MOzatxn<sup>SPL</sup> morphants ( $n = 6$ ) (Figure S6B) compared with non-injected embryos ( $n = 5$ ) (Figure S6A). Next, we examined trunk muscle organization in 48 hpf 0.3 pmol MOzatxn<sup>SPL</sup> morphants ( $n = 6$ ) and age-matched 1 pmol mmMOzatxn<sup>AUG</sup> controls ( $n = 5$ ) using labelling with rhodamine-coupled phalloidin, an F-actin binding molecule that allows visualization of muscle fibres. We were unable to detect any differences between the morphology of trunk muscle of 48 hpf 0.3 pmol MOzatxn<sup>SPL</sup> morphants (Figure S7B) and that observed in 1 pmol mmMOzatxn<sup>AUG</sup> morphants at the same stage (Figure S7A). Taken together, these data show that differentiation of body muscles, spinal cord and motor neurons were not impaired following mild depletion of zebrafish *atxn7* in embryos.

### Discussion

The potential prevalence of mutations that lead to both loss and gain of function in human neurological disease (as shown by the phenotypes of presenilin<sup>-/-</sup> mice) [42], [43] underscores the importance of understanding endogenous functions of causative genes through careful analysis of loss-of-function models, which may uncover critical pathways leading to pathogenesis. Here, we performed a functional analysis of zebrafish *atxn7* in the vertebrate teleost fish *D. rerio* (zebrafish) and investigated the phenotypes caused by various levels of protein depletion. We established a specific requirement for *atxn7* in proper differentiation of the three main neuronal populations that are vulnerable in SCA7, i.e. photoreceptors, and cerebellar Purkinje and granule cells. Although the loss of differentiated neurons observed in SCA7 is clearly distinct from the neuronal differentiation defect seen in MOzatxn<sup>SPL</sup> morphants, the similarity in the neuronal populations affected in the two processes is highly intriguing and suggest that reduced, or altered *atxn7* function, in SCA7 plays a role in the pathophysiology of the disease. Moreover, these data are in good agreement with recent



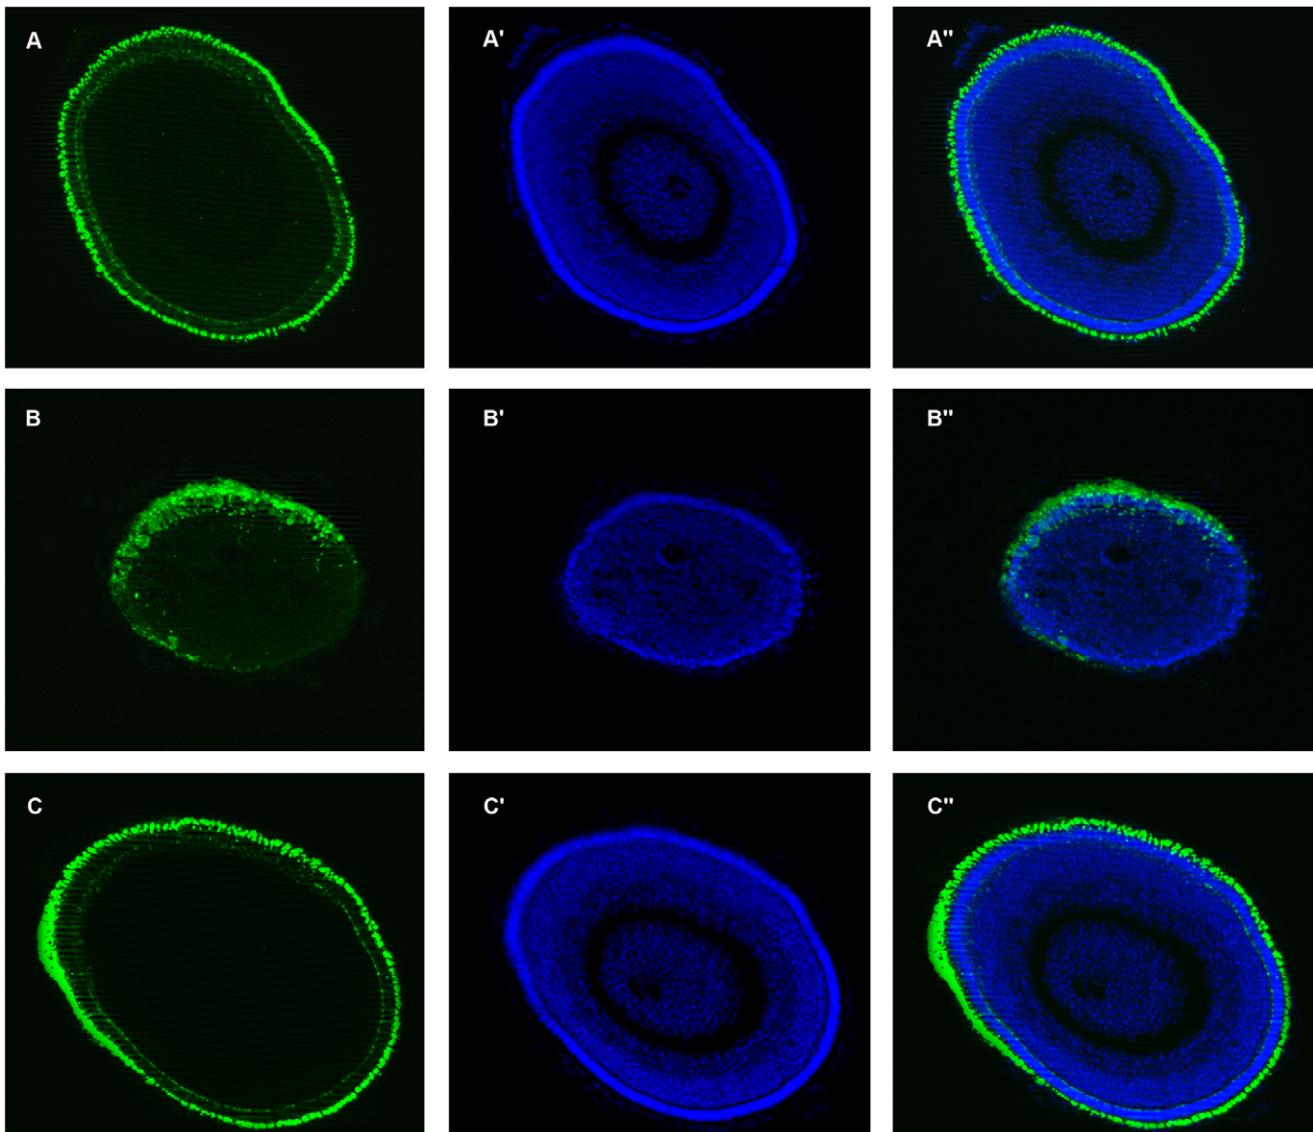

**Figure 7. [1–232] N-terminal fragment of human atxn7 can rescue photoreceptor differentiation defect in 0.3 pmol MOzatxn7<sup>SPL</sup> morphant.** Rhodopsin immunostaining (A, B, and C) and DAPI staining (A', B', and C') of eye cryosections of 48 hpf 1 pmol mmMOzatxn7<sup>AUG</sup> (A, A' and A'') and 0.3 pmol MOzatxn7<sup>SPL</sup> morphants (B, B' and B'') and age matched 0.3 pmol MOzatxn7<sup>SPL</sup> morphant co-injected with 2 fmol human atxn7 mRNA (C, C' and C''). Merge images of the photographs A and A' (A''), B and B' (B''), and C and C' (C'').  
doi:10.1371/journal.pone.0050705.g007

*in vitro* results suggesting that atxn7 plays role in Purkinje cell development and differentiation (Latouche et al., unpublished data). This loss could be the result of either dominant-negative activity of expanded atxn7 as discussed below or partial loss of function caused by heterozygosity of the non-expanded allele combined with progressive trapping of the wild-type protein in neuronal intranuclear inclusions (NII) [44], [45], or both. The dominant mode of inheritance of all polyQ-expansion diseases together with the deleterious effect of isolated polyQ peptides *in vitro* [46] and *in vivo* [46–49], led to the suggestion that pathologically expanded polyQ tract endowed the causative proteins with either a toxic gain of function or a dominant negative activity detrimental to life-long living post-mitotic neurons. However, a body of work also suggests that protein loss of function may also play a role in the disease phenotype in several polyQ disorders, such as SCA6 [50], [51], or HD [52]. In

the case of SCA7, while our data suggest that altered atxn7 function plays a role in the disease phenotype, this hypothesis was challenged by the observation that transgenic mice homozygous for an expanded atxn7<sup>266Q</sup> allele, SCA7<sup>266Q/266Q</sup> mice, but not hemizygous SCA7<sup>266Q/-</sup> mice, displayed a worsened phenotype compared with SCA7<sup>266Q/+</sup> animals [33]. However, it is important to keep in mind that such huge expansions in SCA7 (>200 residues), which have been described in only very few cases, induce pathologies that can no longer be classified as SCA, the disease, manifest from the first weeks post-pregnancy onward, affecting several non-neuronal tissues, such as the heart, kidneys and liver, and causing early lethality during the very first years of life [53–56]. In this context, whether partial depletion of the non-expanded protein participated in the pathophysiology of SCA7 remains an open question; further

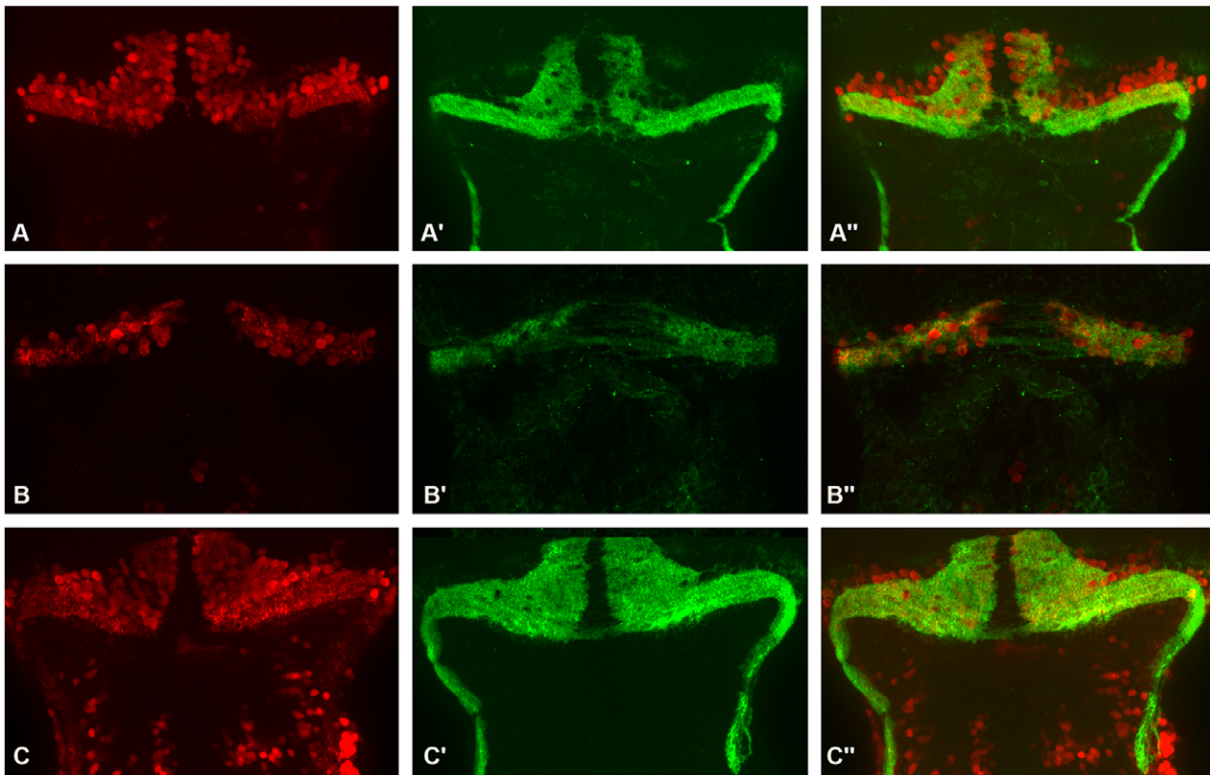

**Figure 8. [1–232] human *atxn7* fragment can rescue differentiation defects of cerebellar neurons in 0.3 pmol MO*zatxn7*<sup>SPL</sup> morphant.** Dorsal views of dissected brains from 5 dpf 1 pmol mmMO*zatxn*<sup>AUG</sup> (A, A' and A'') and 0.3 pmol MO*zatxn7*<sup>SPL</sup> morphants (B, B' and B'') and age-matched 0.3 pmol MO*zatxn7*<sup>SPL</sup> morphant co-injected with human *atxn7* mRNA (2 fmol) (C, C' and C''). Pav7 immunostaining of Purkinje cells (A, B and C) and Vglut1 immunostaining of granule cells (A', B' and C'). Anterior is to the left. Merge images of the photographs A and A' (A''), B and B' (B''), and C and C' (C'').  
doi:10.1371/journal.pone.0050705.g008

studies are required to evaluate the importance of altered *atxn7* function in the disease process.

In the case of zebrafish *atxn7*, in close agreement with the results observed in mammals [16], [31], [32], [57], the gene is expressed throughout embryonic development and in several neuronal populations, including the cerebellum, spinal cord, optic tectum and telencephalon. However, we observed that only the differentiation of photoreceptors and cerebellar neurons was impaired following moderate zebrafish *atxn7* depletion. The fact that differentiation of photoreceptors was compromised following partial loss-of-function of the zebrafish protein was consistent with data from the analysis of several SCA7 mouse models. Indeed, it has been shown that selective vulnerability of photoreceptors in SCA7 is related to interference of the mutant protein with CRX [27], [29], [30], a homeobox transcription factor crucial for photoreceptors differentiation through transcriptional regulation of photoreceptor-specific genes [58–61] and a direct partner of *atxn7* [27]. By analogy, our results suggest that *atxn7*-SAGA might also be a partner of a transcription factor crucial for either differentiation and maintenance of cerebellar neurons or proper expression of another factor essential for cerebellar neuron differentiation and physiology. ROR $\alpha$ , a transcription factor belonging to the family of retinoid-related orphan nuclear-receptors and crucial for proper differentiation of Purkinje cells [62], [63], appears as a good candidate. Indeed, *ror $\alpha$*  was also down-regulated in a knock-in transgenic mouse model of SCA1 (*atxn1*<sup>82Q/82Q</sup>), but not in *atxn1*<sup>-/-</sup> mice [64], [65] and partial loss of function of the *ror $\alpha$*  gene enhanced the pathogenicity

of *atxn1*<sup>82Q</sup> [64]. All these observations raised the question of whether partial *atxn7*/SAGA-mediated ROR $\alpha$  loss of function also underlay Purkinje cell loss in MO*zatxn7* morphant embryos and also possibly in SCA7 patients. The finding that down-regulation of *ror $\alpha$*  or partial loss of ROR $\alpha$  activity plays a role in the pathophysiology of SCA7 would be an important step toward the development of new therapeutic strategies. Further work is now required to evaluate the role of ROR $\alpha$  in cerebellar neuron degeneration in SCA7.

Blast analysis identified 4 *atxn7* paralogs in zebrafish, *zatxn7*, *zatxn7l2a* and *l2b*, and *zatxn7l3*, which are the orthologs of the human *atxn7*, *atxn7L2* and *atxn7L3* genes, respectively. Although our data show a specific requirement for zebrafish *atxn7* in embryonic development and differentiation of photoreceptors and cerebellar neurons, the identification of *atxn7L2* and *atxn7L3* as components of the SAGA complex [66], [67], suggests a possible functional redundancy of these proteins.

Finally, the ability of human *atxn7* to compensate the loss of the zebrafish protein in *D. rerio* embryos emphasizes the conservation of the function of this protein during evolution and thus, the interest of this fish as model to test therapeutic hypotheses.

## Materials and Methods

### Animals

Zebrafish were maintained at 28°C in a standard zebrafish facility (Aquatic Habitats, Apopka, FL, U.S.A.) as described in Westerfield [68]. Developmental stages were determined as hours post-fertilization (hpf) as described by Kimmel et al. [69]. Wild-

type embryos were from the *AB* and *TL* strains. For *in situ* hybridization and immunohistochemistry, embryos were treated with 0.005% phenylthiourea from 20 hpf onward to prevent pigmentation.

### Validation of the Structure and Sequences of the Zebrafish *atxn7* Gene

Zebrafish *atxn7* sequences were found in Ensembl (ENSDARG00000074804). To confirm the *in silico* data, the coding sequence of the gene was amplified from reverse-transcribed adult zebrafish cDNA, using overlapping zebrafish *atxn7*-specific primer sets (available from the authors on request) and directly sequenced using the BigDye technology (Applied Biosystem) in an ABI3730 automated sequencer. Experimental sequences were subsequently aligned with *in silico* predictions using Autoassembler (Applied Biosystems), and the consensus sequence was then analysed by UCSC Blat (<http://genom.ucsc.edu/>) to find the exon-intron boundaries and splice site locations. The zebrafish *atxn7* protein sequence was then aligned with human and mouse counterparts using Align (<http://www.ebi.ac.uk/Tools/emboss/align/>) to determine domain conservation.

### *In situ* Hybridization

The *in situ* detection of zebrafish *atxn7* transcripts on dissected brains was carried out as described in Ayari et al. [70]. *In situ* hybridization on whole-mount embryos was performed principally as described in Yanicostas et al. [71]. The *in situ* hybridization of adult brain sections was done according to Bae et al. [34].

### Immunohistochemistry

Immunohistochemistry on either dissected brains or brain sections was carried out as previously described in Ayari et al., [70]. Primary antibodies anti-parvalbumin7 (anti-Pavlb7, 1/1000, mouse ascites), anti-carbonic 8 (anti-Ca8, 1/100, mouse hybridoma supernatant), anti-vesicular1 glutamate transporter (anti-Vglut1, 1/1000, rabbit purified antibody), anti-zebrin II (1/200, hybridoma supernatant) [72] were used as described in Bae et al. [34]. The rabbit anti-GFAP (DAKO, used at 1:1000 dilution), and human anti-HuC antibodies (kindly provided to us by Jean-Yves Delattre, used at 1:4000 dilution). Eye cryosections were incubated with anti-rhodopsin rho4D2 antibodies (generous gift of Drs Serge Picaud and David Hicks, used at 1:500 dilution) [73]. Primary antibodies were detected using fluorescently labelled secondary antibodies; Alexa 488-coupled goat-anti-rabbit antibodies (Molecular Probes, used at 1:250 dilution), or with the corresponding biotinylated anti-human antibodies (MP Biomedicals Cappel, used at 1:500 dilution) diluted in blocking solution. Secondary biotinylated antibodies were visualized by incubation with Alexa 555-coupled streptavidin (Molecular Probes, used at 1:700 dilution) diluted in PBS. Following immunostaining, dissected brains were mounted on 1% agarose in PBS and photographed using an epifluorescent AXIO imager Z.1 microscope (Zeiss) equipped with an ApoTome system (Zeiss).

### Morpholino-mediated Gene Inactivation

All morpholinos (MO) were designed by and obtained from GeneTools. To inactivate the translation of zebrafish *atxn7* RNAs, we designed a morpholino-oligonucleotide, MO $z_{atxn7}^{AUG}$  (5'-CGTCATCATCGGCCCTTTCCGACAT-3'), which is complementary to the sequence flanking the translation initiating codon of the messenger RNA (underlined). We also designed a second morpholino, MO $z_{atxn7}^{SPL}$  (5'-ATCAAACACACATACACACCTCTC-3') that targets the donor site of the fourth intron

of zebrafish *atxn7* mRNA to impair proper splicing of this intron. As a control, we first designed a morpholino oligonucleotide derived from MO $z_{atxn7}^{AUG}$  but comprising five mismatching bases (lower case letters), mmMO $z_{atxn7}^{AUG}$ , (5'-CcTgAT-CATcGcCCCTTTgCGACAT-3'). We also used a non-specific morpholino oligonucleotide, MO control (5'-CCTCTTACCT-CAGTTACAATTTATA-3'). For morpholino-mediated transcript inactivation experiments, 2 nl of 0.15, 0.3 or 0.5 mM solutions, and corresponding to 0.3, 0.6, and 1 pmol of the different morpholinos, respectively, were injected in 1- to 2-cell stage embryos using standard protocols.

### RT-PCR Analysis of MO $z_{atxn7}^{SPL}$ Splice-blocking Activity

To check the efficiency of MO $z_{atxn7}^{SPL}$ -mediated splice inhibition, a reverse transcription polymerase chain reaction (RT-PCR) was performed using RNAs, which were extracted from embryos that had received 0.3, 0.6, and 1 pmol MO- $z_{atxn7}^{SPL}$ . RNAs were isolated using the RNeasy mini Kit (Qiagen, Germantown, MD, USA) and then reverse transcribed as cDNA using the SuperScript II Reverse Transcriptase (Invitrogen, Carlsbad, CA) according to the manufacturer's instructions. A cDNA fragment of zebrafish *atxn7* encompassing exons 3 to 5 was PCR amplified using the *z\_{atxn7}*-forw (5'-GGCCTTCCAAGCA-CATTAC-3') and *z\_{atxn7}*-rev (5'-GTCATATCCATAACCC-CAC-3') primers.

### Phenotypic Rescue

For rescue experiments, 2 nl of a mix containing MO $z_{atxn7}^{SPL}$  (0.15 mM) and human *atxn7* mRNA (1  $\mu$ M), was injected into embryos at the one- to two-cell stage according to standard protocols, and the phenotypes were analysed at the indicated stages.

### TUNEL Assay

For the detection of apoptotic cells, terminal deoxynucleotidyl transferase dUTP nick end labelling (TUNEL) assay was performed on dissected brains according to Yabu et al. [74].

### Phalloidin-rhodamine Staining

Trunk muscles were visualized by phalloidin-rhodamine staining of F-actin. Briefly, 48 hpf embryos were anesthetized in tricaine, and fixed by an *o/n* incubation in 4% PFA in PBST (PBS, 0.1% Triton X-100) at 4°C, followed by three washes in PBST. Embryos were then incubated for 30 minutes in phalloidin-rhodamine (at 1/100) dissolved in PBS, washed three times in PBST and mounted in 1% low-melting agarose and imaged using a fluorescent microscope equipped with an ApoTome system (Zeiss).

### Ethics Statement

All procedures involving animal handling in this study complied with the guidelines of the French Animal Ethics Committee and was approved by the same committee under the ethics statement: 2012-15/676-0069.

### Supporting Information

**Figure S1 Identification and sequence of the zebrafish *atxn7* gene.** Molecular phylogeny of the human (*hatxn7* or ENSG00000163635; *hatxn7L1* or ENSG00000146776; *hatxn7L2* or ENSG00000162650; *hatxn7L3* or ENSG00000087152; and *hatxn7L3B* or ENSG00000253719) and zebrafish (*z\_{atxn7}* or ENSDARG00000074804; *z\_{atxn7}2a* or ENSDARG00000055300; *z\_{atxn7}2b* or ENSDARG00000056268; and *z\_{atxn7}3* or EN-

SDARG00000029331) *atxn7* paralogs (A). RT-PCR analysis of the transcription of the *zatan7l2a*, *zatan7l2b* and *zatan7l3* genes in zebrafish embryos aged 24, 48 and 72 hpf (B). Sequence alignment of the human (H.s., ENSG00000163635), mouse (M.m., ENSMUSG00000021738), and zebrafish (D.r., ENSDARG00000074804) *atxn7* protein sequences (C). All the sequences were obtained from the Ensembl data base (<http://www.ensembl.org>). Molecular phylogeny was determined using ClustalW2 (<http://www.ebi.ac.uk/Tools/msa/clustalw2/>). Peptidic sequences were aligned using Align (<http://www.ebi.ac.uk/Tools/msa/clustalw2/>). Colour code for amino acids: identical amino acids, red; similar amino acids, blue. Abbreviations: *Homo sapiens*, H.s.; *Mus musculus*, M.m.; *Danio rerio*, D.r. (DOCX)

**Figure S2 Mild zebrafish *atxn7* depletion impairs retina differentiation.** 48 hpf 1 pmol mmMO $zatan7^{AUG}$  (A) and 0.3 pmol MO $zatan7^{AUG}$  morphant embryos (B). Eye of a 48 hpf 1 pmol mmMO $zatan7^{AUG}$  morphant (C) and partially depigmented retinas of 48 hpf 0.3 pmol MO $zatan7^{AUG}$  (D) and 0.3 pmol MO $zatan7^{SPL}$  (E and F) morphant embryos. (TIF)

**Figure S3 Partial zebrafish *atxn7* depletion impairs Purkinje cell differentiation.** Frontal sections of dissected brains of 5 dpf 1 pmol mmMO $zatan7^{AUG}$  (A-A'') and 0.3 pmol MO $zatan7^{SPL}$  morphant embryos (B-B''). ROR $\alpha$  immunostaining of Purkinje cells (A and B) and DAPI staining (A' and B'). Merge images of the photographs A and A' (A'') and B and B' (B''). (TIF)

**Figure S4 Moderate zebrafish *atxn7* depletion does not induce cerebellar neuron apoptosis.** Dorsal views of dissected brains from DNase-treated non-injected control (A and B) and 1 pmol mmMO $zatan7^{AUG}$  (C and D) and 0.3 pmol MO $zatan7^{SPL}$  morphant embryos (E and F). Anterior is to the left. DAPI staining (A, C and E) and TUNEL labelling of apoptotic cells (B, D and F). Abbreviations: TeO, tectum optic; Cer, cerebellum. (TIF)

## References

- David G, Abbas N, Stevanin G, Dürr A, Yvert G, et al. (1997) Cloning of the SCA7 gene reveals a highly unstable CAG repeat expansion. *Nat Genet* 17: 65–70.
- La Spada AR, Wilson EM, Lubahn DB, Harding AE, Fischbeck KH (1991) Androgen receptor gene mutation in X-linked spinal and bulbar muscular atrophy. *Nature* 352: 77–79.
- Huntington's Disease Collaborative Research Group (1993) A novel gene containing a trinucleotide repeat that is expanded and unstable on Huntington's disease chromosomes. *Cell* 72: 971–983.
- Koide R, Ikeuchi T, Onodera O, Tanaka H, Igarashi S, et al. (1994) Unstable expansion of CAG repeat in hereditary dentatorubral-pallidoluyian atrophy (DRPLA). *Nat Genet* 6: 9–13.
- Orr HT, Chung MY, Banfi S, Kwiatkowski TJ Jr, Servadio A, et al. (1993) Expansion of an unstable trinucleotide CAG repeat in spinocerebellar ataxia type 1. *Nat Genet* 4: 221–226.
- Kawaguchi Y, Okamoto T, Taniwaki M, Aizawa M, Inoue M, et al. (1994) CAG expansion in a novel gene for Machado-Joseph disease at chromosome 14q32.1. *Nat Genet* 8: 221–228.
- Imbert G, Saudou F, Yvert G, Devys D, Trotter Y, et al. (1996) Cloning of the gene for spinocerebellar ataxia 2 reveals a locus with high sensitivity to expanded CAG/glutamine repeats. *Nat Genet* 14: 285–291.
- Pulst SM, Nechiporuk A, Nechiporuk T, Gispert S, Chen XN, et al. (1996) Moderate expansion of a normally biallelic trinucleotide repeat in spinocerebellar ataxia type 2. *Nat Genet* 14: 269–276.
- Sanpei K, Takano H, Igarashi S, Sato T, Oyake M, et al. (1996) Identification of the spinocerebellar ataxia type 2 gene using a direct identification of repeat expansion and cloning technique DIRECT. *Nat Genet* 14: 277–284.
- Zhuchenko O, Bailey J, Bonnen P, Ashizawa T, Stockton DW, et al. (1997) Autosomal dominant cerebellar ataxia (SCA6) associated with small polyglutamine expansion in the  $\alpha 1A$ -voltage-dependent calcium channel. *Nat Genet* 15: 62–69.
- Koide R, Kobayashi S, Shimohata T, Ikeuchi T, Maruyama M, et al. (1999) A neurological disease caused by an expanded CAG trinucleotide repeat in the TATA-binding protein gene: a new polyglutamine disease? *Hum Mol Genet* 8: 2047–2053.
- Fujigasaki H, Martin JJ, De Deyn PP, Camuzat A, Deffond D, et al. (2001) CAG repeat expansion in the TATA box-binding gene causes autosomal dominant cerebellar ataxia. *Brain* 124: 1939–1947.
- Nakamura K, Jeong SY, Uchiyama T, Anno M, Nagashima K, et al. (2001) SCA17, a novel autosomal dominant cerebellar ataxia caused by an expanded polyglutamine in TATA-binding protein. *Hum Mol Genet* 10: 1441–1448.
- Dürr A, Stevanin G, Cancel G, Duyckaerts C, Abbas N, et al. (1996) Spinocerebellar ataxia 3 and Machado-Joseph disease: clinical, molecular, and neuropathological features. *Ann Neurol* 39: 490–499.
- Martin JJ, Van Regemorter N, Krols L, Brucher JM, de Barys T, et al. (1994) On an autosomal dominant form of retinal-cerebellar degeneration: an autopsy study of five patients in one family. *Acta Neuropathol* 88: 277–286.
- Cancel G, Duyckaerts C, Holmberg M, Zander C, Yvert G, et al. (2000) Distribution of ataxin-7 in normal brain and retina. *Brain* 123: 2519–2530.
- Stevanin G, Dürr A, Brice A (2000) Clinical and molecular advances in autosomal dominant cerebellar ataxias: from genotype to phenotype and physiopathology. *Eur J Hum Genet* 8: 4–18.
- Lebre AS, Brice A (2003) Spinocerebellar ataxia 7 (SCA7). *Cytogenet Genome Res* 100: 154–163.
- Taroni F, DiDonato S (2004) Pathways to motor incoordination: the inherited ataxias. *Nat Rev Neurosci* 5: 641–655.
- Orr HT, Zoghbi HY (2007) Trinucleotide repeat disorders. *Annu Rev Neurosci* 30: 575–621.
- Garden GA, La Spada AR (2008) Molecular pathogenesis and cellular pathology of spinocerebellar ataxia type 7 neurodegeneration. *Cerebellum* 7: 138–149.
- Paulson HL (2009) The spinocerebellar ataxias. *J Neuroophthalmol* 29: 227–237.

**Figure S5 Mild zebrafish *atxn7* depletion does not impair overall brain organization.** Dorsal view of dissected brains from 5 dpf 1 pmol mmMO $zatan7^{AUG}$  (A-C) and 0.3 pmol MO $zatan7^{SPL}$  morphant embryos (D-F). Anterior is to the left. GFAP immunostaining of glial cells (A and D) and HuC immunostaining of neuronal cells (B and E). Merge images of the photographs A and B (C) and D and E (F). (TIF)

**Figure S6 Partial zebrafish *atxn7* depletion does not impair spinal cord differentiation.** Lateral views of 48 hpf Tg[NBT:MAPT-GFP]zcl transgenic embryos following injection of 1 pmol mmMO $zatan7^{AUG}$  (A) and 0.3 pmol MO $zatan7^{SPL}$  (B). Anterior is to the left. (TIF)

**Figure S7 Moderate zebrafish *atxn7* depletion does not impair the differentiation of trunk muscles.** Lateral views of 48 hpf 1 pmol mmMO $zatan7^{AUG}$  (A) and 0.3 pmol MO $zatan7^{SPL}$  morphant embryos (B) following rhodamine-coupled phalloidin labelling of muscle F-actin. Anterior is to the left. (TIF)

**Table S1 Phenotypes of zebrafish *atxn7* knockdown embryos.** (DOCX)

## Acknowledgments

The authors are grateful to Dr. M. Latouche for helpful discussions, to Drs S. Picaud and D. Hicks for the anti-rhodopsin antibody and to J.C. Fernandez for technical assistance.

## Author Contributions

Conceived and designed the experiments: CY NSY. Performed the experiments: CY EB NSY. Analyzed the data: CY NSY. Contributed reagents/materials/analysis tools: MH. Wrote the paper: CY NSY GS AB.

23. Helmlinger D, Hardy S, Sasorith S, Klein F, Robert F, et al. (2004) Ataxin-7 is a subunit of GCN5 histone acetyltransferase-containing complexes. *Hum Mol Genet* 13: 1257–1265.
24. Helmlinger D, Hardy S, Abou-Sleymane G, Eberlin A, Bowman AB, et al. (2006) Glutamine-expanded ataxin-7 alters TFIIIC/STAGA recruitment and chromatin structure leading to photoreceptor dysfunction. *PLoS Biol* 4(3): e67.
25. McMahon SJ, Pray-Grant MG, Schieltz D, Yates JR III, Grant PA (2005) Polyglutamine-expanded spinocerebellar ataxia-7 protein disrupts normal SAGA and SILK histone acetyltransferase activity. *Proc Natl Acad Sci USA* 102: 8478–8482.
26. Palhan VB, Chen S, Peng GH, Tjernberg A, Gamper AM, et al. (2005) Polyglutamine-expanded ataxin-7 inhibits STAGA histone acetyltransferase activity to produce retinal degeneration. *Proc Natl Acad Sci USA* 102: 8472–8477.
27. La Spada AR, Fu YH, Sopher BL, Libby RT, Wang X, et al. (2001) Polyglutamine-expanded ataxin-7 antagonizes CRX function and induces cone-rod dystrophy in a mouse model of SCA7. *Neuron* 31: 913–927.
28. Aleman TS, Cideciyan AV, Volpe NJ, Stevanin G, Brice A, et al. (2002) Spinocerebellar ataxia type 7 (SCA7) shows a cone-rod dystrophy phenotype. *Exp Eye Res* 74: 737–745.
29. Chen S, Peng GH, Wang X, Smith AC, Grote SK, et al. (2004) Interference of CRX-dependent transcription by ataxin-7 involves interaction between the glutamine regions and requires the ataxin-7 carboxy-terminal region for nuclear localization. *Hum Mol Genet* 13: 53–67.
30. Abou-Sleymane G, Chalmel F, Helmlinger D, Lardenois A, Thibault C, et al. (2006) Polyglutamine expansion causes neurodegeneration by altering the neuronal differentiation program. *Hum Mol Genet* 15: 691–703.
31. Jonasson J, Ström AL, Hart P, Brännström T, Forsgren L, et al. (2002) Expression of ataxin-7 in CNS and non-CNS tissue of normal and SCA7 individuals. *Acta Neuropathol* 104: 29–37.
32. Ström AL, Jonasson J, Hart P, Brännström T, Forsgren L, et al. (2002) Cloning and expression analysis of the murine homolog of the spinocerebellar ataxia type 7 (SCA7) gene. *Gene* 285: 91–99.
33. Yoo SY, Pennesi ME, Weeber EJ, Xu B, Atkinson R, et al. (2003) SCA7 knockin mice model human SCA7 and reveal gradual accumulation of mutant ataxin-7 in neurons and abnormalities in short-term plasticity. *Neuron* 37: 383–401.
34. Bae YK, Kani S, Shimizu T, Tanabe K, Nojima H, et al. (2009) Anatomy of zebrafish cerebellum and screen for mutations affecting its development. *Dev Biol* 330: 406–426.
35. Garden GA, Libby RT, Fu YH, Kinoshita Y, Huang J, et al. (2002) Polyglutamine-expanded ataxin-7 promotes non-cell-autonomous Purkinje cell degeneration and displays proteolytic cleavage in ataxic transgenic mice. *J Neurosci* 22: 4897–4905.
36. Wang HL, Yeh TH, Chou AH, Kuo YL, Luo LJ, et al. (2006) Polyglutamine-expanded ataxin-7 activates mitochondrial apoptotic pathway of cerebellar neurons by upregulating Bax and downregulating Bcl-x<sub>L</sub>. *Cell Signal* 18: 541–552.
37. Latouche M, Lasbleiz C, Martin E, Monnier V, Debeir T, et al. (2007) A conditional pan-neuronal Drosophila model of spinocerebellar ataxia 7 with a reversible adult phenotype suitable for identifying modifier genes. *J Neurosci* 27: 2483–2492.
38. Garden GA, Ellerby LM, La Spada AR (2006) Genetic instabilities and neurological diseases. In Wells AT, eds (ed.), *Spinocerebellar ataxia type 7: clinical features to cellular pathogenesis*, San Diego, CA, USA, 399–416.
39. Nielsen AL, Jorgensen AL (2003) Structural and functional characterization of the zebrafish gene for glial fibrillary acidic protein, GFAP. *Gene* 310: 123–132.
40. Mueller T, Wullmann MF (2002) BrdU-, neuroD (nrd)- and Hu-studies reveal unusual non-ventricular neurogenesis in the postembryonic zebrafish forebrain. *Mech Dev* 117: 123–135.
41. Tilton F, Tanguay RL (2008) Exposure to sodium metam during zebrafish somitogenesis results in early transcriptional indicators of the ensuing neuronal and muscular dysfunction. *Toxicol Sci* 106: 103–122.
42. De Strooper B (2007) Loss-of-function presenilin mutations in Alzheimer disease. Taking point on the role of presenilin mutations in Alzheimer disease. *EMBO Rep* 8: 141–145.
43. Chen Q, Nakajima A, Choi SH, Xiong X, Tang YP (2008) Loss of presenilin function causes Alzheimer's disease-like neurodegeneration in the mouse. *J Neurosci Res* 86: 1615–1625.
44. Zander C, Takahashi J, El Hachimi KH, Fujigasaki H, Albanese V, et al. (2001) Similarities between spinocerebellar ataxia type 7 (SCA7) cell models and human brain: proteins recruited in inclusions and activation of caspase 3. *Hum Mol Genet* 10: 2569–2579.
45. Scholfield J, Greenberg LJ, Weinberg MS, Arbuthnot PB, Abdelgany A, et al. (2009) Design of RNAi hairpins for mutation-specific silencing of ataxin-7 and correction of a SCA7 phenotype. *PLoS One* 4: e7232.
46. Ikeda H, Yamaguchi M, Sugai S, Aze Y, Narumiya S, et al. (1996) Expanded polyglutamine in the Machado-Joseph disease protein induces cell death in vitro and in vivo. *Nat Genet* 13: 196–202.
47. Ordway JM, Tallaksen-Greene S, Gutekunst CA, Bernstein EM, Cearley JA, et al. (1997) Ectopically expressed CAG repeats cause intranuclear inclusions and a progressive late onset neurological phenotype in the mouse. *Cell* 91: 753–763.
48. Marsh JL, Walker H, Theisen H, Zhu ZY, Fielder T, et al. (2000) Expanded polyglutamine peptides alone are intrinsically cytotoxic and cause neurodegeneration in Drosophila. *Hum Mol Genet* 9: 13–25.
49. McLeod CJ, O'Keefe LV, Richards RI (2005) The pathogenic agent in Drosophila models of 'polyglutamine' diseases. *Hum Mol Genet* 14: 1041–1048.
50. Jun K, Piedras-Renteria ES, Smith SM, Wheeler DB, Lee SB, et al. (1999) Ablation of P/Q-type Ca<sup>2+</sup> channel currents, altered synaptic transmission, and progressive ataxia in mice lacking the  $\alpha_{1A}$ -subunit. *Proc Natl Acad Sci USA* 96: 15245–15250.
51. Miyasaki T, Hashimoto K, Shin HS, Kano M, Watanabe M (2004) P/Q-type Ca<sup>2+</sup> channel  $\alpha_{1A}$  regulates synaptic competition on developing cerebellar Purkinje cells. *J Neurosci* 24: 1734–1743.
52. Nasir J, Floresco SB, O'Kusky JR, Diewert VM, Richman JM, et al. (1995) Targeted disruption of the Huntington's disease gene results in embryonic lethality and behavioural and morphological changes in heterozygotes. *Cell* 81: 811–823.
53. Johansson J, Forsgren L, Sandgren O, Brice A, Holmgren G, et al. (1998) Expanded CAG repeats in Swedish spinocerebellar ataxia type 7 (SCA7) patients: effect of CAG repeat length on the clinical manifestation. *Hum Mol Genet* 7: 171–176.
54. Benton CS, de Silva R, Rutledge SL, Bohlega S, Ashizawa T, et al. (1998) Molecular and clinical studies in SCA7 define a broad clinical spectrum and infantile phenotype. *Neurology* 51: 1081–1086.
55. Van de Warrenburg BPC, Frenken CWGM, Ausems MGEM, Kleefstra T, Sinke RJ, et al. (2001) Striking anticipation in spinocerebellar ataxia type 7: the infantile phenotype. *J Neurol* 248: 911–914.
56. Whitney A, Lim M, Kanabar D, Lin JP (2007) Massive SCA7 expansion detected in a 7-month-old male with hypotonia, cardiomegaly, and renal compromise. *Dev Med Child Neurol* 49: 140–143.
57. Einum DD, Townsend JJ, Ptacek LJ, Fu YH (2001) Ataxin-7 expression analysis in controls and spinocerebellar ataxia type 7 patients. *Neurogenetics* 3: 83–90.
58. Furukawa T, Morrow EM, Cepko CL (1997) Crx, a novel otx-like homeobox gene, shows photoreceptor-specific expression and regulates photoreceptor differentiation. *Cell* 91: 531–541.
59. Freund CL, Gregory-Evans CY, Furukawa T, Papaioannou M, Looser J, et al. (1997) Cone-rod dystrophy due to mutations in a novel photoreceptor-specific homeobox gene (CRX) essential for maintenance of the photoreceptor. *Cell* 91: 543–553.
60. Freund CL, Wang QL, Chen S, Muskat BL, Wiles CD, et al. (1998) De novo mutations in the CRX homeobox gene associated with Leber congenital amaurosis. *Nat Genet* 18: 311–312.
61. Swain PK, Chen S, Wang QL, Affatigato LM, Coats CL, et al. (1997) Mutations in the cone-rod homeobox gene are associated with the cone-rod dystrophy photoreceptor degeneration. *Neuron* 19: 1329–1336.
62. Landis DM, Sidman RL (1978) Electron microscopic analysis of postnatal histogenesis in the cerebellar cortex of *staggerer* mutant mice. *J Comp Neurol* 179: 831–863.
63. Hatten ME, Messer A (1978) Postnatal cerebellar cells from *staggerer* mutant mice express embryonic cell surface characteristic. *Nature* 276: 504–506.
64. Serra HG, Duvick L, Zu T, Carlson K, Stevens S, et al. (2006) ROR $\alpha$ -mediated Purkinje cell development determines disease severity in adult *SCA1* mice. *Cell* 127: 697–708.
65. Crespo-Barreto J, Fryer JD, Shaw CA, Orr HT, Zoghbi HY (2010) Partial loss of ataxin-1 function contributes to transcriptional dysregulation in spinocerebellar ataxia type 1 pathogenesis. *PLoS Genet* 6: e1001021.
66. Sowa ME, Bennett EJ, Gygi SP, Harper JW (2009) Defining the human deubiquitinating enzyme interaction landscape. *Cell* 138: 389–403.
67. Krebs AR, Demmers J, Karmodiya K, Chang NC, Chang AC, et al. (2010) ATAC and mediator coactivators form a stable complex and regulate a set of non-coding RNA genes. *EMBO reports* 11: 541–547.
68. Westerfield M (2000) *The zebrafish book. A guide for the laboratory use of zebrafish (Danio rerio)*. 4<sup>th</sup> ed. Univ. of Oregon Press, Eugene, Oregon. United States of America.
69. Kimmel CB, Ballard WW, Kimmel SR, Ullmann B, Schilling TF (1995) Stages of embryonic development of the zebrafish. *Dev Dyn* 233: 253–310.
70. Ayari B, El Hachimi KH, Yanicostas C, Landoulsi A, Soussi-Yanicostas N (2010) Prokineticin 2 expression is associated with neural repair of injured adult zebrafish telencephalon. *J Neurotrauma* 27: 959–972.
71. Yanicostas C, Ernest S, Dayraud C, Petit C, Soussi-Yanicostas N (2008) Essential requirement for zebrafish anosmin-1a in the migration of the posterior lateral line primordium. *Dev Biol* 320: 469–479.
72. Lannoo MJ, Ross L, Maler L, Hawkes R (1991) Development of the cerebellum and its extracerebellar Purkinje cell projection in teleost fishes as determined by zebrin II immunocytochemistry. *Prog Neurobiol* 37: 329–363.
73. Hicks D, Molday RS (1986) Differential immunogold-dextran labeling of bovine and frog rod and cone cells using monoclonal antibodies against bovine rhodopsin. *Exp Eye Res* 42: 55–71.
74. Yabu T, Todoriki S, Yamashita M (2001) Stress-induced apoptosis by heat shock, UV and  $\gamma$ -ray irradiation in zebrafish embryos detected by increased caspase activity and whole mount TUNEL staining. *Fish Sci* 67: 333–340.
